# Supplementary material for: Prospective Associations between Cumulative Average Intake of Flavonoids and Hypertension Risk in the CArdioVascular Disease Association Study (CAVAS)
Source: MDPI journal article supplement (doi:10.3390/nu15051186), 2023-02-27
Supplement: s1 [file s1]

**Supplementary Table S1.** Baseline characteristics of the study participants (n = 10,325)<sup>a</sup>

**Supplementary Table S2.** Contribution of the seven flavonoid subclasses to flavonoid intake (n = 10,325)

**Supplementary Table S3.** Incidence rate ratio of hypertension by quartiles of dietary intake of flavonoids and their subclasses (n = 10,325)

**Supplementary Table S4.** Incidence rate ratio of hypertension by quartiles of dietary intake of 35 individual flavonoid compounds (n = 10,325)

**Supplementary Figure S1.** Timeline of study follow-up in KoGES\_CAVAS cohort

**Supplementary Figure S2.** Flowchart of study in KoGES\_CAVAS cohort

**Supplementary Table S1.** Baseline characteristics of the study participants (n = 10,325)<sup>a</sup>

| Characteristic                     | Total         | Men          | Women         | p-value |
|------------------------------------|---------------|--------------|---------------|---------|
| N (%)                              | 10,325        | 3,766 (36.5) | 6,559 (63.5)  | —       |
| No. cases/ person-year             | 2,159 /53,678 | 854 /19,369  | 1,305 /34,308 |         |
| Age, y                             | 56.9 ± 9.73   | 58.5 ± 9.73  | 55.9 ± 9.61   | <.0001  |
| Higher education <sup>b</sup>      | 31.6          | 38.3         | 27.7          | <.0001  |
| Regular exercise <sup>c</sup>      | 21.2          | 20.0         | 21.8          | 0.0277  |
| Current smoker                     |               |              |               |         |
| Never-smoker                       | 70.9          | 27.3         | 95.9          | <.0001  |
| Past smoker                        | 13.2          | 33.9         | 1.30          |         |
| Current smoker                     | 16.0          | 38.8         | 2.85          |         |
| Menopausal status                  | 70.1          | —            | 70.1          | —       |
| Family history of hypertension     | 17.8          | 13.9         | 20.0          | <.0001  |
| Current drinker                    | 42.1          | 62.6         | 30.3          | <.0001  |
| Alcohol consumption, ml/d          | 11.3 ± 35.9   | 26.8 ± 54.4  | 2.42 ± 10.9   | <.0001  |
| Body Mass index, kg/m <sup>2</sup> | 23.9 ± 3.00   | 23.7 ± 2.85  | 24.0 ± 3.08   | <.0001  |
| Waist circumference, cm            | 82.6 ± 8.66   | 84.5 ± 7.91  | 81.5 ± 8.88   | <.0001  |
| Total energy intake, kcal/d        | 1,579 ± 438   | 1,699 ± 445  | 1,509 ± 418   | <.0001  |
| Modified DASH scores <sup>d</sup>  | 17.4 ± 3.14   | 17.2 ± 3.18  | 17.5 ± 3.11   | 0.0004  |
| <b>Total flavonoids, mg/d</b>      | 176 ± 164     | 161 ± 142    | 185 ± 175     | —       |
| Flavonols                          | 18.1 ± 14.0   | 18.1 ± 13.5  | 18.0 ± 14.3   | 0.7977  |
| Flavones                           | 1.85 ± 1.28   | 1.73 ± 1.13  | 1.91 ± 1.36   | <.0001  |
| Flavanones                         | 9.03 ± 10.9   | 7.11 ± 9.07  | 10.1 ± 11.7   | <.0001  |
| Flavan-3-ols                       | 58.4 ± 112    | 55.7 ± 99.4  | 60.0 ± 118    | 0.0461  |
| Anthocyanins                       | 8.87 ± 10.8   | 7.25 ± 9.03  | 9.66 ± 11.7   | <.0001  |
| Isoflavones                        | 19.1 ± 15.3   | 19.7 ± 15.8  | 18.7 ± 15.0   | <.0001  |
| Proanthocyanins                    | 60.7 ± 62.3   | 51.1 ± 51.7  | 66.2 ± 67.0   | <.0001  |

<sup>a</sup> Values are expressed as mean ± standard deviation for continuous variables and percentages for categorical variables.

<sup>b</sup> Higher education level (≥12 years of schooling).

<sup>c</sup> Regular exercise (≥3 times/week and ≥30 min/session).

<sup>d</sup> Modified Dietary Approaches to Stop Hypertension (DASH) scores were calculated based on six out of eight components after excluding fruits and vegetables and modifying the 'Nuts/legumes' into 'Nuts' without legumes.

**Supplementary Table S2.** Contribution of the seven flavonoid subclasses to flavonoid intake (n = 10,325)

| Ranking <sup>a</sup> | Subclasses         | Men                  |                              |                           | Women                |                 |              |
|----------------------|--------------------|----------------------|------------------------------|---------------------------|----------------------|-----------------|--------------|
|                      |                    | Median (IQR), mg/day | Contribution, % <sup>b</sup> | Variation, % <sup>c</sup> | Median (IQR), mg/day | Contribution, % | Variation, % |
| 1                    | Proanthocyanindins | 36.5 (19.7-64.2)     | 33.06                        | 22.3                      | 46.4 (24.3-85.8)     | 37.34           | 24.21        |
| 2                    | Flavan-3-ols       | 17.4 (6.36-52.7)     | 24.07                        | 74.2                      | 18.5 (7.06-52.6)     | 22.34           | 73.17        |
| 3                    | Isoflavones        | 15.1 (8.58-25.9)     | 16.92                        | 1.82                      | 14.2 (8.31-25.0)     | 14.58           | 0.7          |
| 4                    | Flavonols          | 15.0 (9.83-22.3)     | 15.13                        | 1.00                      | 14.5 (8.99-22.6)     | 13.03           | 0.12         |
| 5                    | Flavanones         | 4.58 (1.82-9.21)     | 4.80                         | 0.53                      | 6.79 (2.95-13.3)     | 6.01            | 0.11         |
| 6                    | Anthocyanins       | 4.60 (1.90-9.01)     | 4.57                         | 0.14                      | 6.19 (2.63-12.7)     | 5.32            | 0.36         |
| 7                    | Flavones           | 1.49 (0.97-2.16)     | 1.45                         | 0.00                      | 1.60 (1.02-2.43)     | 1.38            | 1.34         |
| Total                | Flavonoids         | 118 (69.3-206)       | 100%                         | 100%                      | 133 (75.8-236)       | 100%            | 100%         |

IQR: Interquartile range.

<sup>a</sup> Ranking of the contribution of individual subclasses to total flavonoid intake.

<sup>b</sup> Contribution to total flavonoid intake.

<sup>c</sup> Proportion of explained variation by the regression model.

**Supplementary Table S3.** Incidence rate ratio of hypertension by quartiles of dietary intake of flavonoids and their subclasses (n = 10,325)

| Sensitivity analysis                                            | Men (n = 3766) |                  |                  |                  |                                            |                                                | Women (n = 6559) |                  |                  |                  |                               |                                   |
|-----------------------------------------------------------------|----------------|------------------|------------------|------------------|--------------------------------------------|------------------------------------------------|------------------|------------------|------------------|------------------|-------------------------------|-----------------------------------|
|                                                                 | Q1             | Q2               | Q3               | Q4               | <i>P</i> <sub>linearity</sub> <sup>a</sup> | <i>P</i> <sub>non-linearity</sub> <sup>b</sup> | Q1               | Q2               | Q3               | Q4               | <i>P</i> <sub>linearity</sub> | <i>P</i> <sub>non-linearity</sub> |
| <b>Total flavonoids</b>                                         |                |                  |                  |                  |                                            |                                                |                  |                  |                  |                  |                               |                                   |
| After censoring CVD and cancer                                  | 1 (ref)        | 0.66 (0.55-0.81) | 0.71 (0.58-0.86) | 0.84 (0.68-1.04) | 0.9985                                     | <0.0001                                        | 1 (ref)          | 0.74 (0.64-0.86) | 0.81 (0.69-0.95) | 0.89 (0.74-1.07) | 0.8887                        | 0.0002                            |
| Excluding cases within the first 2 year <sup>c</sup>            | 1 (ref)        | 0.69 (0.56-0.84) | 0.67 (0.54-0.84) | 0.82 (0.66-1.03) | 0.7762                                     | <0.0001                                        | 1 (ref)          | 0.79 (0.67-0.94) | 0.83 (0.70-1.00) | 0.82 (0.67-1.00) | 0.2752                        | 0.0350                            |
| Only non-users of antioxidant component supplement <sup>c</sup> | 1 (ref)        | 0.67 (0.55-0.82) | 0.67 (0.54-0.84) | 0.81 (0.64-1.02) | 0.6062                                     | <0.0001                                        | 1 (ref)          | 0.67 (0.56-0.79) | 0.82 (0.69-0.98) | 0.85 (0.70-1.05) | 0.8839                        | <0.0001                           |
| <b>Flavonols</b>                                                |                |                  |                  |                  |                                            |                                                |                  |                  |                  |                  |                               |                                   |
| After censoring CVD and cancer                                  | 1 (ref)        | 0.63 (0.52-0.76) | 0.69 (0.57-0.84) | 0.75 (0.61-0.93) | 0.1510                                     | <0.0001                                        | 1 (ref)          | 0.74 (0.63-0.86) | 0.72 (0.61-0.84) | 0.83 (0.69-0.98) | 0.2808                        | <0.0001                           |
| Excluding cases within the first 2 year                         | 1 (ref)        | 0.66 (0.54-0.81) | 0.73 (0.60-0.90) | 0.84 (0.68-1.05) | 0.6960                                     | 0.0002                                         | 1 (ref)          | 0.74 (0.63-0.87) | 0.69 (0.58-0.83) | 0.76 (0.63-0.93) | 0.0718                        | 0.0003                            |
| Only non-users of antioxidant component supplement              | 1 (ref)        | 0.63 (0.52-0.78) | 0.69 (0.56-0.85) | 0.79 (0.63-0.99) | 0.2915                                     | <0.0001                                        | 1 (ref)          | 0.72 (0.61-0.85) | 0.70 (0.59-0.84) | 0.83 (0.68-1.01) | 0.3114                        | <0.0001                           |
| <b>Flavones</b>                                                 |                |                  |                  |                  |                                            |                                                |                  |                  |                  |                  |                               |                                   |
| After censoring CVD and cancer                                  | 1 (ref)        | 0.78 (0.64-0.94) | 0.68 (0.55-0.83) | 0.91 (0.73-1.13) | 0.6824                                     | 0.0001                                         | 1 (ref)          | 0.93 (0.80-1.08) | 0.79 (0.67-0.93) | 0.96 (0.80-1.15) | 0.6652                        | 0.0074                            |
| Excluding cases within the first 2 year                         | 1 (ref)        | 0.89 (0.73-1.09) | 0.72 (0.58-0.90) | 0.97 (0.77-1.24) | 0.9303                                     | 0.0039                                         | 1 (ref)          | 0.91 (0.77-1.07) | 0.76 (0.64-0.91) | 0.86 (0.71-1.05) | 0.1573                        | 0.0320                            |

|                                                    |         |                  |                  |                  |        |         |         |                  |                  |                  |        |         |
|----------------------------------------------------|---------|------------------|------------------|------------------|--------|---------|---------|------------------|------------------|------------------|--------|---------|
| Only non-users of antioxidant component supplement | 1 (ref) | 0.75 (0.62-0.92) | 0.64 (0.51-0.80) | 0.89 (0.70-1.12) | 0.5147 | <0.0001 | 1 (ref) | 0.90 (0.76-1.06) | 0.83 (0.70-1.00) | 0.98 (0.80-1.20) | 0.9252 | 0.0690  |
| <b>Flavanones</b>                                  |         |                  |                  |                  |        |         |         |                  |                  |                  |        |         |
| After censoring CVD and cancer                     | 1 (ref) | 0.65 (0.54-0.79) | 0.57 (0.47-0.69) | 0.73 (0.60-0.89) | 0.0955 | <0.0001 | 1 (ref) | 0.78 (0.67-0.90) | 0.77 (0.66-0.89) | 0.73 (0.62-0.86) | 0.0033 | 0.0120  |
| Excluding cases within the first 2 year            | 1 (ref) | 0.68 (0.56-0.83) | 0.58 (0.47-0.72) | 0.75 (0.60-0.93) | 0.1588 | <0.0001 | 1 (ref) | 0.82 (0.70-0.96) | 0.80 (0.68-0.95) | 0.72 (0.60-0.87) | 0.0032 | 0.1700  |
| Only non-users of antioxidant component supplement | 1 (ref) | 0.62 (0.51-0.75) | 0.55 (0.45-0.68) | 0.67 (0.54-0.83) | 0.0201 | <0.0001 | 1 (ref) | 0.79 (0.67-0.93) | 0.79 (0.66-0.93) | 0.74 (0.61-0.90) | 0.0129 | 0.0450  |
| <b>Flavan-3ols</b>                                 |         |                  |                  |                  |        |         |         |                  |                  |                  |        |         |
| After censoring CVD and cancer                     | 1 (ref) | 0.64 (0.53-0.78) | 0.69 (0.57-0.84) | 0.77 (0.63-0.93) | 0.8121 | <0.0001 | 1 (ref) | 0.82 (0.71-0.96) | 0.89 (0.76-1.05) | 0.86 (0.73-1.02) | 0.5101 | 0.0450  |
| Excluding cases within the first 2 year            | 1 (ref) | 0.62 (0.50-0.76) | 0.70 (0.57-0.86) | 0.74 (0.60-0.91) | 0.6609 | <0.0001 | 1 (ref) | 0.92 (0.78-1.08) | 0.96 (0.81-1.15) | 0.89 (0.74-1.07) | 0.3214 | 0.5800  |
| Only non-users of antioxidant component supplement | 1 (ref) | 0.65 (0.53-0.79) | 0.67 (0.55-0.83) | 0.71 (0.58-0.88) | 0.2816 | <0.0001 | 1 (ref) | 0.79 (0.67-0.93) | 0.90 (0.75-1.07) | 0.86 (0.71-1.03) | 0.5650 | 0.0210  |
| <b>Anthocyanins</b>                                |         |                  |                  |                  |        |         |         |                  |                  |                  |        |         |
| After censoring CVD and cancer                     | 1 (ref) | 0.73 (0.61-0.88) | 0.62 (0.51-0.76) | 0.72 (0.58-0.88) | 0.0331 | <0.0001 | 1 (ref) | 0.76 (0.66-0.89) | 0.72 (0.62-0.84) | 0.74 (0.63-0.87) | 0.0081 | 0.0008  |
| Excluding cases within the first 2 year            | 1 (ref) | 0.74 (0.61-0.89) | 0.62 (0.50-0.76) | 0.70 (0.56-0.87) | 0.0222 | 0.0003  | 1 (ref) | 0.79 (0.67-0.94) | 0.78 (0.66-0.92) | 0.71 (0.60-0.85) | 0.0029 | 0.0530  |
| Only non-users of antioxidant component supplement | 1 (ref) | 0.70 (0.58-0.85) | 0.57 (0.46-0.70) | 0.69 (0.55-0.86) | 0.0196 | <0.0001 | 1 (ref) | 0.79 (0.66-0.93) | 0.74 (0.62-0.88) | 0.79 (0.66-0.94) | 0.0597 | 0.0054  |
| <b>Isoflavones</b>                                 |         |                  |                  |                  |        |         |         |                  |                  |                  |        |         |
| After censoring CVD and cancer                     | 1 (ref) | 0.76 (0.63-0.92) | 0.62 (0.51-0.76) | 0.76 (0.62-0.93) | 0.0579 | <0.0001 | 1 (ref) | 0.76 (0.65-0.88) | 0.68 (0.58-0.80) | 0.81 (0.69-0.95) | 0.1356 | <0.0001 |
| Excluding cases within the first 2 year            | 1 (ref) | 0.79 (0.65-0.97) | 0.67 (0.55-0.83) | 0.83 (0.67-1.03) | 0.3365 | 0.0013  | 1 (ref) | 0.76 (0.65-0.91) | 0.69 (0.58-0.83) | 0.82 (0.68-0.98) | 0.2417 | 0.00025 |
| Only non-users of antioxidant component supplement | 1 (ref) | 0.74 (0.60-0.90) | 0.59 (0.48-0.73) | 0.74 (0.60-0.91) | 0.0370 | <0.0001 | 1 (ref) | 0.73 (0.62-0.87) | 0.67 (0.56-0.79) | 0.77 (0.64-0.92) | 0.0567 | <0.0001 |
| <b>Proanthocyanidins</b>                           |         |                  |                  |                  |        |         |         |                  |                  |                  |        |         |
| After censoring CVD and cancer                     | 1 (ref) | 0.82 (0.68-0.98) | 0.74 (0.61-0.90) | 0.76 (0.61-0.94) | 0.0487 | 0.0540  | 1 (ref) | 0.79 (0.68-0.92) | 0.71 (0.61-0.83) | 0.73 (0.61-0.87) | 0.0043 | 0.0029  |
| Excluding cases within the first 2 year            | 1 (ref) | 0.77 (0.63-0.94) | 0.75 (0.61-0.92) | 0.72 (0.57-0.91) | 0.0345 | 0.0650  | 1 (ref) | 0.81 (0.68-0.95) | 0.74 (0.62-0.88) | 0.68 (0.56-0.83) | 0.0080 | 0.0710  |
| Only non-users of antioxidant component supplement | 1 (ref) | 0.77 (0.63-0.93) | 0.69 (0.56-0.86) | 0.70 (0.56-0.88) | 0.0135 | 0.0270  | 1 (ref) | 0.77 (0.65-0.91) | 0.70 (0.59-0.84) | 0.78 (0.64-0.95) | 0.0609 | 0.0013  |

DASH, Dietary Approaches to Stop Hypertension) score.

The multivariable model was adjusted for age (years), higher education level ( $\geq 12$  years of schooling), regular exercise ( $\geq 3$  times/week and  $\geq 30$  min/session), smoking (current/past/non-smokers for men and current/non-smokers for women), current drinkers (yes or no), body mass index (BMI), total energy intake (kcal/d), family history of hypertension (yes or no), menopausal status (yes or no for only women), and baseline blood pressures.

<sup>a</sup> *P* values for linear trends were obtained by treating the median value of each group as a continuous variable.

<sup>b</sup> *P* values for non-linear trends were obtained by Wald test to compare the deviance of the linear trend model to the deviance of the categorical model.

<sup>c</sup> Among participants excluding cases within the first 2 years after baseline (n = 3,568 for men, n = 6,224 for women)

<sup>d</sup> Among only non-users of antioxidant component supplements (n = 3,112 for men, n = 4,914 for women)

**Supplementary Table S4.** Incidence rate ratio of hypertension by quartiles of dietary intake of 35 individual flavonoid compounds (n = 10,325)

| Flavonoids, mg/d                | Men (n = 3766) |                         |                         |                         |                                            |                                                | Women (n = 6559) |                         |                          |                         |                                            |                                                |
|---------------------------------|----------------|-------------------------|-------------------------|-------------------------|--------------------------------------------|------------------------------------------------|------------------|-------------------------|--------------------------|-------------------------|--------------------------------------------|------------------------------------------------|
|                                 | Q1             | Q2                      | Q3                      | Q4                      | <i>P</i> <sub>linearity</sub> <sup>a</sup> | <i>P</i> <sub>non-linearity</sub> <sup>b</sup> | Q1               | Q2                      | Q3                       | Q4                      | <i>P</i> <sub>linearity</sub> <sup>a</sup> | <i>P</i> <sub>non-linearity</sub> <sup>b</sup> |
| <b>Flavonols</b>                |                |                         |                         |                         |                                            |                                                |                  |                         |                          |                         |                                            |                                                |
| Quercetin                       | 1 (ref)        | <b>0.72 (0.60-0.87)</b> | <b>0.69 (0.57-0.84)</b> | <b>0.77 (0.62-0.95)</b> | 0.0851                                     | <b>0.0009</b>                                  | 1 (ref)          | <b>0.72 (0.62-0.83)</b> | <b>0.72 (0.62-0.84)</b>  | <b>0.85 (0.72-1.00)</b> | 0.4000                                     | <b>&lt;0.0001</b>                              |
| Kaempferol                      | 1 (ref)        | <b>0.70 (0.58-0.84)</b> | <b>0.69 (0.57-0.83)</b> | <b>0.81 (0.67-0.98)</b> | 0.3972                                     | <b>0.0001</b>                                  | 1 (ref)          | 0.86 (0.74-1.00)        | <b>0.78 (0.67-0.92)</b>  | 0.86 (0.73-1.01)        | 0.2226                                     | <b>0.0180</b>                                  |
| Myricetin                       | 1 (ref)        | <b>0.72 (0.59-0.87)</b> | 0.90 (0.75-1.09)        | 0.97 (0.80-1.18)        | 0.3774                                     | <b>0.0012</b>                                  | 1 (ref)          | <b>0.82 (0.71-0.95)</b> | <b>0.77 (0.66-0.89)</b>  | 0.92 (0.78-1.08)        | 0.8652                                     | <b>0.0006</b>                                  |
| Isorhamnetin                    | 1 (ref)        | <b>0.67 (0.56-0.80)</b> | <b>0.66 (0.55-0.79)</b> | <b>0.75 (0.62-0.90)</b> | 0.0855                                     | <b>&lt;0.0001</b>                              | 1 (ref)          | <b>0.73 (0.63-0.85)</b> | <b>0.68 (0.58-0.79)</b>  | <b>0.68 (0.58-0.80)</b> | <b>0.0002</b>                              | <b>0.0002</b>                                  |
| <b>Flavones</b>                 |                |                         |                         |                         |                                            |                                                |                  |                         |                          |                         |                                            |                                                |
| Luteolin                        | 1 (ref)        | <b>0.68 (0.57-0.82)</b> | <b>0.66 (0.54-0.79)</b> | <b>0.71 (0.58-0.87)</b> | <b>0.0127</b>                              | <b>0.0002</b>                                  | 1 (ref)          | <b>0.78 (0.67-0.90)</b> | <b>0.72 (0.62-0.84)</b>  | 0.89 (0.76-1.05)        | 0.5016                                     | <b>&lt;0.0001</b>                              |
| Apigenin                        | 1 (ref)        | <b>0.80 (0.67-0.96)</b> | <b>0.72 (0.59-0.88)</b> | 0.99 (0.81-1.22)        | 0.4619                                     | <b>0.0003</b>                                  | 1 (ref)          | 0.94 (0.81-1.09)        | <b>0.81 (0.69-0.94)</b>  | 0.94 (0.79-1.12)        | 0.5063                                     | <b>0.0220</b>                                  |
| <b>Flavanones</b>               |                |                         |                         |                         |                                            |                                                |                  |                         |                          |                         |                                            |                                                |
| Hesperetin                      | 1 (ref)        | <b>0.59 (0.50-0.71)</b> | <b>0.60 (0.50-0.72)</b> | <b>0.70 (0.58-0.84)</b> | 0.1358                                     | <b>&lt;0.0001</b>                              | 1 (ref)          | <b>0.76 (0.66-0.88)</b> | <b>0.78 (0.67-0.91)</b>  | <b>0.77 (0.66-0.91)</b> | 0.0605                                     | <b>0.0017</b>                                  |
| Naringenin                      | 1 (ref)        | <b>0.59 (0.49-0.71)</b> | <b>0.57 (0.47-0.68)</b> | <b>0.69 (0.57-0.83)</b> | <b>0.0306</b>                              | <b>&lt;0.0001</b>                              | 1 (ref)          | <b>0.78 (0.67-0.90)</b> | <b>0.75 (0.64-0.87)</b>  | <b>0.73 (0.62-0.85)</b> | <b>0.0016</b>                              | <b>0.0074</b>                                  |
| Eriodictyol                     | 1 (ref)        | <b>0.71 (0.60-0.86)</b> | <b>0.72 (0.59-0.87)</b> | <b>0.80 (0.66-0.98)</b> | 0.7221                                     | <b>0.0002</b>                                  | 1 (ref)          | <b>0.83 (0.71-0.96)</b> | <b>0.83 (0.71-0.97)</b>  | 0.85 (0.72-1.01)        | 0.4341                                     | <b>0.0220</b>                                  |
| <b>Flavan-3-ols</b>             |                |                         |                         |                         |                                            |                                                |                  |                         |                          |                         |                                            |                                                |
| Catechin                        | 1 (ref)        | <b>0.79 (0.66-0.95)</b> | <b>0.71 (0.59-0.86)</b> | 0.86 (0.70-1.05)        | 0.6054                                     | <b>0.0015</b>                                  | 1 (ref)          | 0.87 (0.75-1.01)        | <b>0.73 (0.62-0.86)</b>  | <b>0.84 (0.70-0.99)</b> | 0.1145                                     | <b>0.0018</b>                                  |
| Epicatechin                     | 1 (ref)        | <b>0.66 (0.55-0.80)</b> | <b>0.73 (0.61-0.88)</b> | 0.86 (0.71-1.05)        | 0.8501                                     | <b>&lt;0.0001</b>                              | 1 (ref)          | 0.76 (0.66-0.88)        | 0.72 (0.61-0.84)         | 0.92 (0.77-1.08)        | 0.8057                                     | <b>&lt;0.0001</b>                              |
| Epigallocatechin                | 1 (ref)        | <b>0.74 (0.62-0.89)</b> | <b>0.71 (0.58-0.86)</b> | <b>0.76 (0.63-0.92)</b> | 0.3267                                     | <b>0.0006</b>                                  | 1 (ref)          | <b>0.74 (0.64-0.86)</b> | 0.88 (0.76-1.03)         | <b>0.77 (0.65-0.90)</b> | 0.0753                                     | <b>0.0004</b>                                  |
| Epicatechin gallate (ECG)       | 1 (ref)        | <b>0.65 (0.54-0.78)</b> | <b>0.66 (0.55-0.80)</b> | <b>0.72 (0.60-0.86)</b> | 0.3707                                     | <b>&lt;0.0001</b>                              | 1 (ref)          | <b>0.79 (0.68-0.91)</b> | 0.90 (0.77-1.05)         | <b>0.82 (0.70-0.96)</b> | 0.2143                                     | <b>0.0070</b>                                  |
| Epigallocatechin gallate (EGCG) | 1 (ref)        | <b>0.64 (0.53-0.76)</b> | <b>0.61 (0.51-0.73)</b> | <b>0.67 (0.56-0.81)</b> | 0.2157                                     | <b>&lt;0.0001</b>                              | 1 (ref)          | <b>0.77 (0.67-0.90)</b> | <b>0.85 (0.73-0.99)</b>  | <b>0.76 (0.65-0.89)</b> | 0.0532                                     | <b>0.0030</b>                                  |
| Gallocatechin                   | 1 (ref)        | <b>0.61 (0.51-0.73)</b> | <b>0.60 (0.50-0.72)</b> | <b>0.69 (0.57-0.82)</b> | 0.3949                                     | <b>&lt;0.0001</b>                              | 1 (ref)          | <b>0.79 (0.68-0.91)</b> | 0.86 (0.75-1.00)         | <b>0.80 (0.68-0.94)</b> | 0.1552                                     | <b>0.0058</b>                                  |
| Theaflavin                      | 1 (ref)        | <b>0.59 (0.48-0.73)</b> | <b>0.67 (0.56-0.79)</b> | <b>0.75 (0.63-0.89)</b> | 0.2261                                     | <b>&lt;0.0001</b>                              | 1 (ref)          | <b>0.66 (0.55-0.79)</b> | 0.87 (0.76-1.00)         | <b>0.80 (0.69-0.92)</b> | 0.0667                                     | <b>&lt;0.0001</b>                              |
| Thearubigin                     | 1 (ref)        | <b>0.59 (0.48-0.73)</b> | <b>0.67 (0.56-0.79)</b> | <b>0.75 (0.63-0.89)</b> | 0.2261                                     | <b>&lt;0.0001</b>                              | 1 (ref)          | <b>0.66 (0.55-0.79)</b> | <b>0.87 (0.76-0.99)</b>  | <b>0.80 (0.69-0.92)</b> | 0.0723                                     | <b>&lt;0.0001</b>                              |
| Theaflavin 3'-gallate           | 1 (ref)        | <b>0.59 (0.49-0.73)</b> | <b>0.67 (0.56-0.79)</b> | <b>0.75 (0.63-0.89)</b> | 0.2261                                     | <b>&lt;0.0001</b>                              | 1 (ref)          | <b>0.66 (0.55-0.79)</b> | <b>0.87 (0.76-0.995)</b> | <b>0.80 (0.69-0.92)</b> | 0.6667                                     | <b>&lt;0.0001</b>                              |
| Theaflavin 3-3'-digallate       | 1 (ref)        | <b>0.59 (0.48-0.73)</b> | <b>0.67 (0.56-0.79)</b> | <b>0.75 (0.63-0.89)</b> | 0.2261                                     | <b>&lt;0.0001</b>                              | 1 (ref)          | <b>0.66 (0.55-0.79)</b> | <b>0.87 (0.76-0.995)</b> | <b>0.80 (0.69-0.92)</b> | 0.6667                                     | <b>&lt;0.0001</b>                              |
| <b>Anthocyanins</b>             |                |                         |                         |                         |                                            |                                                |                  |                         |                          |                         |                                            |                                                |
| Cyanidin                        | 1 (ref)        | <b>0.80 (0.67-0.96)</b> | <b>0.65 (0.54-0.80)</b> | <b>0.72 (0.59-0.89)</b> | <b>0.0124</b>                              | <b>0.0023</b>                                  | 1 (ref)          | <b>0.71 (0.61-0.83)</b> | <b>0.66 (0.57-0.77)</b>  | <b>0.72 (0.60-0.85)</b> | <b>0.0102</b>                              | <b>&lt;0.0001</b>                              |
| Delphinidin                     | 1 (ref)        | <b>0.65 (0.54-0.78)</b> | <b>0.60 (0.50-0.72)</b> | <b>0.69 (0.57-0.84)</b> | 0.0588                                     | <b>&lt;0.0001</b>                              | 1 (ref)          | <b>0.78 (0.68-0.90)</b> | <b>0.67 (0.58-0.78)</b>  | <b>0.68 (0.58-0.80)</b> | <b>&lt;.0001</b>                           | <b>0.0002</b>                                  |
| Malvidin                        | 1 (ref)        | <b>0.62 (0.52-0.74)</b> | <b>0.54 (0.45-0.65)</b> | <b>0.69 (0.57-0.84)</b> | 0.1408                                     | <b>&lt;0.0001</b>                              | 1 (ref)          | <b>0.80 (0.69-0.92)</b> | <b>0.68 (0.59-0.80)</b>  | <b>0.67 (0.57-0.78)</b> | <b>&lt;.0001</b>                           | <b>0.0021</b>                                  |
| Pelargonidin                    | 1 (ref)        | <b>0.76 (0.64-0.90)</b> | <b>0.56 (0.46-0.68)</b> | <b>0.74 (0.61-0.90)</b> | 0.0881                                     | <b>&lt;0.0001</b>                              | 1 (ref)          | <b>0.80 (0.69-0.92)</b> | <b>0.77 (0.66-0.90)</b>  | <b>0.66 (0.57-0.78)</b> | <b>&lt;.0001</b>                           | <b>0.0230</b>                                  |
| Peonidin                        | 1 (ref)        | <b>0.63 (0.53-0.75)</b> | <b>0.56 (0.47-0.68)</b> | <b>0.69 (0.57-0.83)</b> | 0.0764                                     | <b>&lt;0.0001</b>                              | 1 (ref)          | <b>0.74 (0.64-0.85)</b> | <b>0.67 (0.57-0.78)</b>  | <b>0.66 (0.57-0.77)</b> | <b>&lt;.0001</b>                           | <b>0.0001</b>                                  |
| Petunidin                       | 1 (ref)        | <b>0.64 (0.54-0.77)</b> | <b>0.58 (0.49-0.70)</b> | <b>0.68 (0.56-0.83)</b> | 0.0586                                     | <b>&lt;0.0001</b>                              | 1 (ref)          | <b>0.76 (0.66-0.88)</b> | <b>0.69 (0.59-0.80)</b>  | <b>0.66 (0.57-0.77)</b> | <b>&lt;.0001</b>                           | <b>0.0005</b>                                  |
| <b>Isoflavones</b>              |                |                         |                         |                         |                                            |                                                |                  |                         |                          |                         |                                            |                                                |
| Daidzein                        | 1 (ref)        | <b>0.78 (0.65-0.94)</b> | <b>0.62 (0.51-0.74)</b> | <b>0.79 (0.65-0.96)</b> | 0.0910                                     | <b>&lt;0.0001</b>                              | 1 (ref)          | <b>0.76 (0.65-0.89)</b> | <b>0.68 (0.58-0.79)</b>  | <b>0.80 (0.68-0.93)</b> | 0.0913                                     | <b>&lt;0.0001</b>                              |
| Genistein                       | 1 (ref)        | <b>0.73 (0.61-0.88)</b> | <b>0.61 (0.51-0.74)</b> | <b>0.76 (0.63-0.92)</b> | 0.0734                                     | <b>&lt;0.0001</b>                              | 1 (ref)          | <b>0.78 (0.67-0.91)</b> | <b>0.68 (0.58-0.80)</b>  | <b>0.80 (0.68-0.93)</b> | 0.0584                                     | <b>0.0001</b>                                  |
| Glycitein                       | 1 (ref)        | <b>0.74 (0.62-0.89)</b> | <b>0.59 (0.49-0.71)</b> | <b>0.77 (0.64-0.94)</b> | 0.1096                                     | <b>&lt;0.0001</b>                              | 1 (ref)          | <b>0.74 (0.63-0.86)</b> | <b>0.68 (0.58-0.80)</b>  | <b>0.80 (0.68-0.93)</b> | 0.1315                                     | <b>&lt;0.0001</b>                              |
| Biochanin A                     | 1 (ref)        | <b>0.73 (0.61-0.87)</b> | <b>0.60 (0.49-0.73)</b> | <b>0.74 (0.60-0.90)</b> | 0.0868                                     | <b>&lt;0.0001</b>                              | 1 (ref)          | <b>0.77 (0.67-0.89)</b> | <b>0.68 (0.58-0.80)</b>  | <b>0.72 (0.61-0.85)</b> | <b>0.0033</b>                              | <b>0.0002</b>                                  |

|                          |         |                         |                         |                         |               |                   |         |                         |                         |                         |               |               |
|--------------------------|---------|-------------------------|-------------------------|-------------------------|---------------|-------------------|---------|-------------------------|-------------------------|-------------------------|---------------|---------------|
| Formononetin             | 1 (ref) | 0.90 (0.74-1.09)        | 0.87 (0.72-1.05)        | 1.13 (0.93-1.38)        | 0.1652        | <b>0.0250</b>     | 1 (ref) | <b>0.74 (0.64-0.86)</b> | 0.92 (0.79-1.06)        | 0.87 (0.75-1.01)        | 0.3491        | <b>0.0006</b> |
| <b>Proanthocyanidins</b> |         |                         |                         |                         |               |                   |         |                         |                         |                         |               |               |
| Dimer                    | 1 (ref) | <b>0.80 (0.67-0.96)</b> | <b>0.76 (0.62-0.91)</b> | <b>0.77 (0.62-0.95)</b> | 0.0572        | 0.0530            | 1 (ref) | 0.89 (0.76-1.03)        | <b>0.74 (0.63-0.87)</b> | <b>0.83 (0.69-0.98)</b> | 0.0613        | <b>0.0062</b> |
| Trimer                   | 1 (ref) | 0.86 (0.72-1.03)        | 0.86 (0.71-1.04)        | 0.85 (0.68-1.05)        | 0.1979        | 0.3900            | 1 (ref) | <b>0.76 (0.65-0.88)</b> | <b>0.78 (0.67-0.91)</b> | <b>0.80 (0.67-0.96)</b> | 0.0704        | <b>0.0024</b> |
| 4-6mers                  | 1 (ref) | 0.87 (0.73-1.05)        | <b>0.76 (0.63-0.92)</b> | <b>0.77 (0.62-0.94)</b> | <b>0.0268</b> | 0.1500            | 1 (ref) | <b>0.78 (0.67-0.90)</b> | <b>0.68 (0.58-0.79)</b> | <b>0.72 (0.61-0.86)</b> | <b>0.0049</b> | <b>0.0002</b> |
| 7-10mers                 | 1 (ref) | <b>0.76 (0.64-0.91)</b> | <b>0.59 (0.48-0.71)</b> | <b>0.69 (0.57-0.85)</b> | <b>0.0121</b> | <b>&lt;0.0001</b> | 1 (ref) | <b>0.76 (0.65-0.88)</b> | <b>0.71 (0.61-0.82)</b> | <b>0.69 (0.58-0.82)</b> | <b>0.0012</b> | <b>0.0006</b> |
| Polymer                  | 1 (ref) | <b>0.69 (0.58-0.83)</b> | <b>0.67 (0.55-0.80)</b> | <b>0.67 (0.55-0.83)</b> | <b>0.0093</b> | <b>0.0003</b>     | 1 (ref) | <b>0.79 (0.68-0.91)</b> | <b>0.72 (0.62-0.84)</b> | <b>0.72 (0.61-0.85)</b> | <b>0.0016</b> | <b>0.0049</b> |

Multivariable model was adjusted for age (years), higher education level ( $\geq 12$  schooling years), regular exercise ( $\geq 3$  times/week and  $\geq 30$  min/session), smoking (current/past/non-smokers for men and current/non-smokers for women), current drinkers (yes or no), body mass index (BMI), total energy intake (kcal/d), family history of hypertension (yes or no), menopausal status (yes or no for only women), and baseline blood pressures.

<sup>a</sup>  $P$  values for linear trends were obtained by treating the median value of each group as a continuous variable.

<sup>b</sup>  $P$  values for non-linear trends were obtained by comparing the deviance difference between linear trend model on 1 degree of freedom (d.f.) and  $\ell$  ordered categorical model on  $\ell - 1$  d.f.

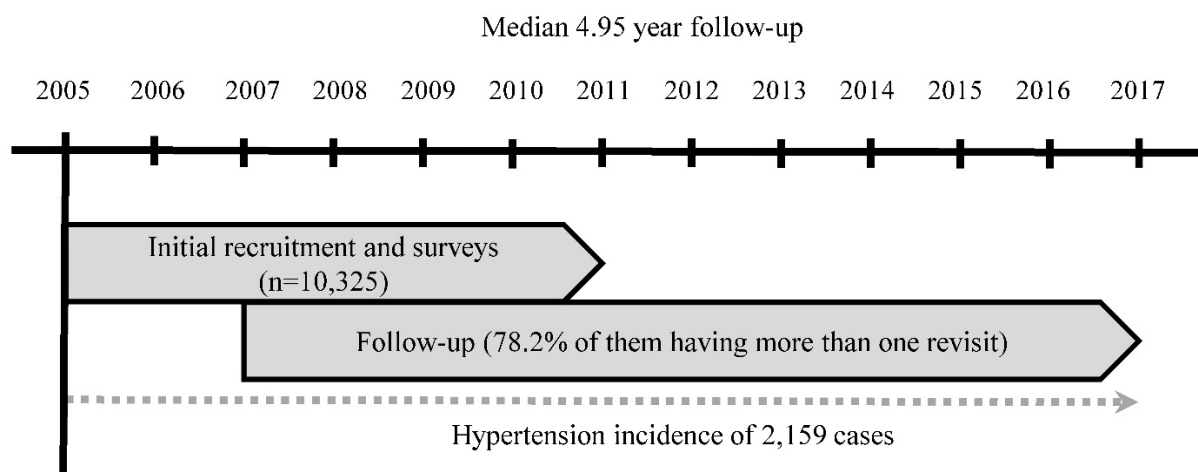

**Supplementary Figure S1.** Timeline of study follow-up in KoGES\_CAVAS cohort

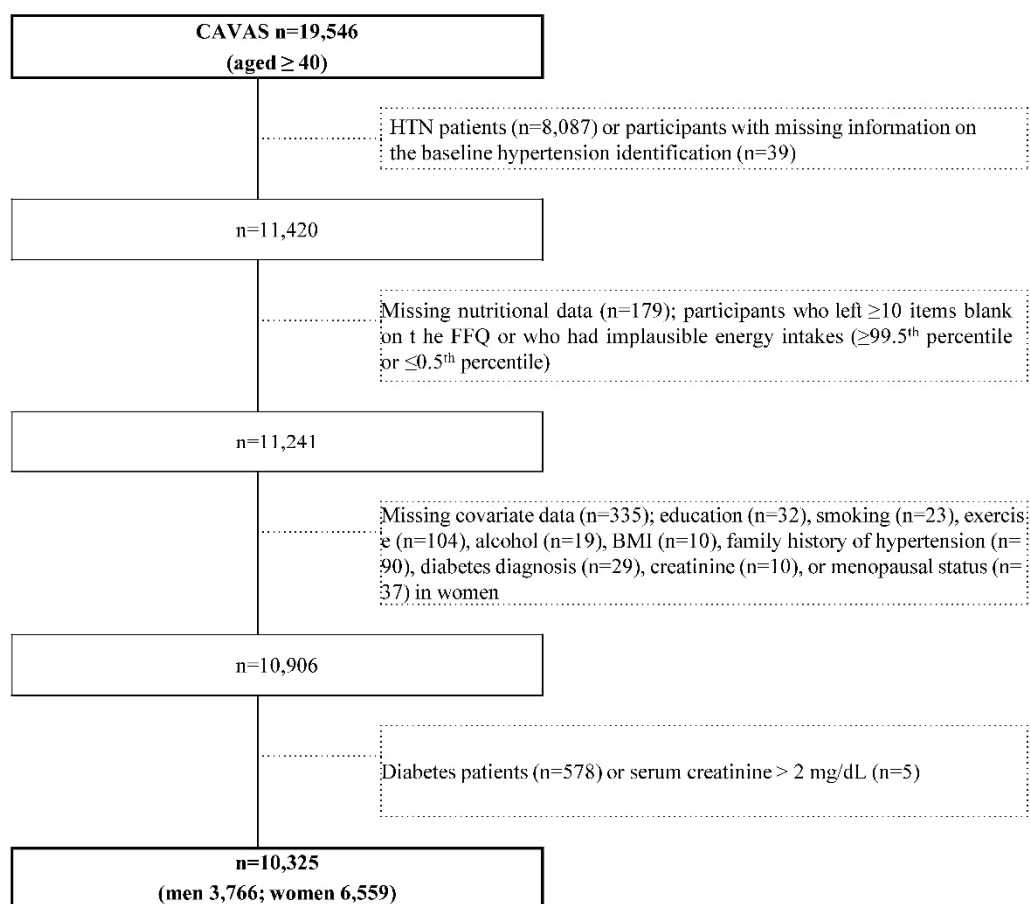

**Supplementary Figure S2.** Flowchart of study in KoGES\_CAVAS cohort
